# Supplementary material for: Imaging of Multiple Myeloma: Present and Future
Source: MDPI journal article supplement (doi:10.3390/jcm13010264), 2024-01-02
Supplement: s1 [file s1]

Supplementary Files:

## TYPES OF CURVES

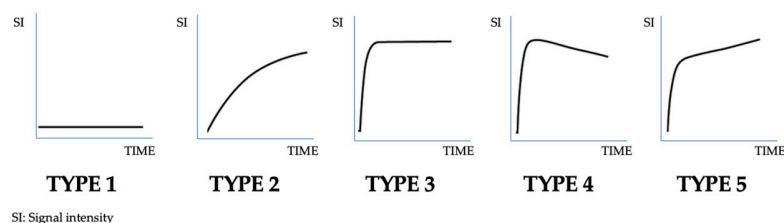

**Figure S1.** Dynamic contrast-enhanced MR curve types.

| Category                            | Point value |
|-------------------------------------|-------------|
| <u>Lesion latency</u> <sup>a</sup>  |             |
| < 6 months                          | 0           |
| 6 months to 1 year                  | 2           |
| > 1 year                            | 4           |
| <u>Lesion size (cm<sup>2</sup>)</u> |             |
| < 5                                 | 0           |
| ≥ 5                                 | 2           |
| <u>Lesion location</u>              |             |
| Diaphysis or epiphysis              | 0           |
| Metaphysis                          | 3           |
| <u>Pain</u> <sup>b</sup>            |             |
| No                                  | 0           |
| Yes                                 | 2           |

<sup>a</sup> From diagnosis of multiple myeloma to identification of the lesion of interest.

<sup>b</sup> Functional means worsened by activity or loading of the bone.

**Figure S2.** Novel scoring system to predict the risk of pathologic fracture in patients with multiple myeloma-related bone lesions.

| ELEMENT OF SINS                                                                                                               | SCORE |
|-------------------------------------------------------------------------------------------------------------------------------|-------|
| LOCATION                                                                                                                      |       |
| Junctional (occiput-C2, C7-T2, T11-L1, L5-S1)                                                                                 | 3     |
| Mobile spine (C3-C6, L2-L4)                                                                                                   | 2     |
| Semi-rigid (T3-T10)                                                                                                           | 1     |
| Rigid (S2-S5)                                                                                                                 | 0     |
| PAIN RELIEF WITH RECUMBENCY AND/OR PAIN WITH MOVEMENT/LOADING OF THE SPINE                                                    |       |
| Yes                                                                                                                           | 3     |
| No (occasional but not mechanical)                                                                                            | 1     |
| Pain free lesion                                                                                                              | 0     |
| BONE LESION                                                                                                                   |       |
| Lytic 2                                                                                                                       | 2     |
| Mixed (lytic/blastic)                                                                                                         | 1     |
| Blastic                                                                                                                       | 0     |
| RADIOGRAPHIC SPINAL ALIGNMENT                                                                                                 |       |
| Subluxation/translation present                                                                                               | 4     |
| De novo deformity (kyphosis/scoliosis)                                                                                        | 2     |
| Normal alignment                                                                                                              | 0     |
| VERTEBRAL BODY COLLAPSE                                                                                                       |       |
| 50% collapse                                                                                                                  | 3     |
| 50% collapse                                                                                                                  | 2     |
| No collapse with 50% body involved                                                                                            | 1     |
| None of the above                                                                                                             | 0     |
| POSTEROLATERAL INVOLVEMENT OF THE SPINAL ELEMENTS (facet, pedicle or costovertebral joint fracture or replacement with tumor) |       |
| Bilateral                                                                                                                     | 3     |
| Unilateral                                                                                                                    | 1     |
| None of the above                                                                                                             | 0     |

**Figure S3.** Spinal Instability Neoplastic Scale.

|                  |                                                                                                   |
|------------------|---------------------------------------------------------------------------------------------------|
| <b>Grade 0:</b>  | Osseous disease only                                                                              |
| <b>Grade 1a:</b> | Epidural involvement without thecal sac deformation                                               |
| <b>Grade 1b:</b> | Thecal sac deformation without cord contact                                                       |
| <b>Grade 1c:</b> | Thecal sac deformation with cord contact                                                          |
| <b>Grade 2:</b>  | Spinal cord/cauda equina/radicular compression with fluid (even minimal) around the neural tissue |
| <b>Grade 3:</b>  | Spinal cord/cauda equina or radicular compression, with no visible CSF around the neural tissue   |

**Figure S4.** Epidural Spinal Cord Compression Scale
